# Supplementary material
Source: Springer Nature journal article supplement (https://www.springermedizin.de/resource/supplementary/12933_2009_204_MOESM1_ESM.pdf/9539834)

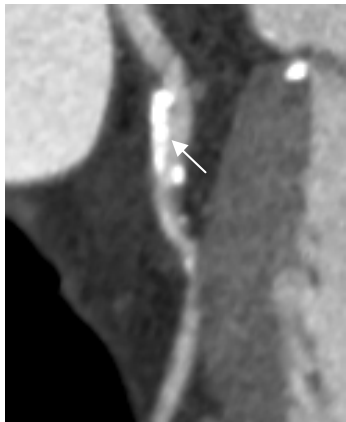

a) calcified plaque

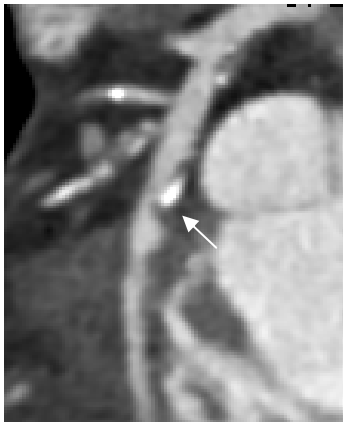

b) mixed plaque

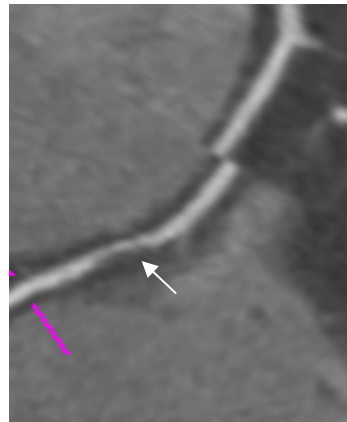

c) non-calcified  
plaque

Supplement: MOESM1 [file 9539834]
